# Supplementary material
Source: MDPI journal article supplement (https://www.mdpi.com/2073-4395/11/6/1233)
Supplement: s1 [file s1]

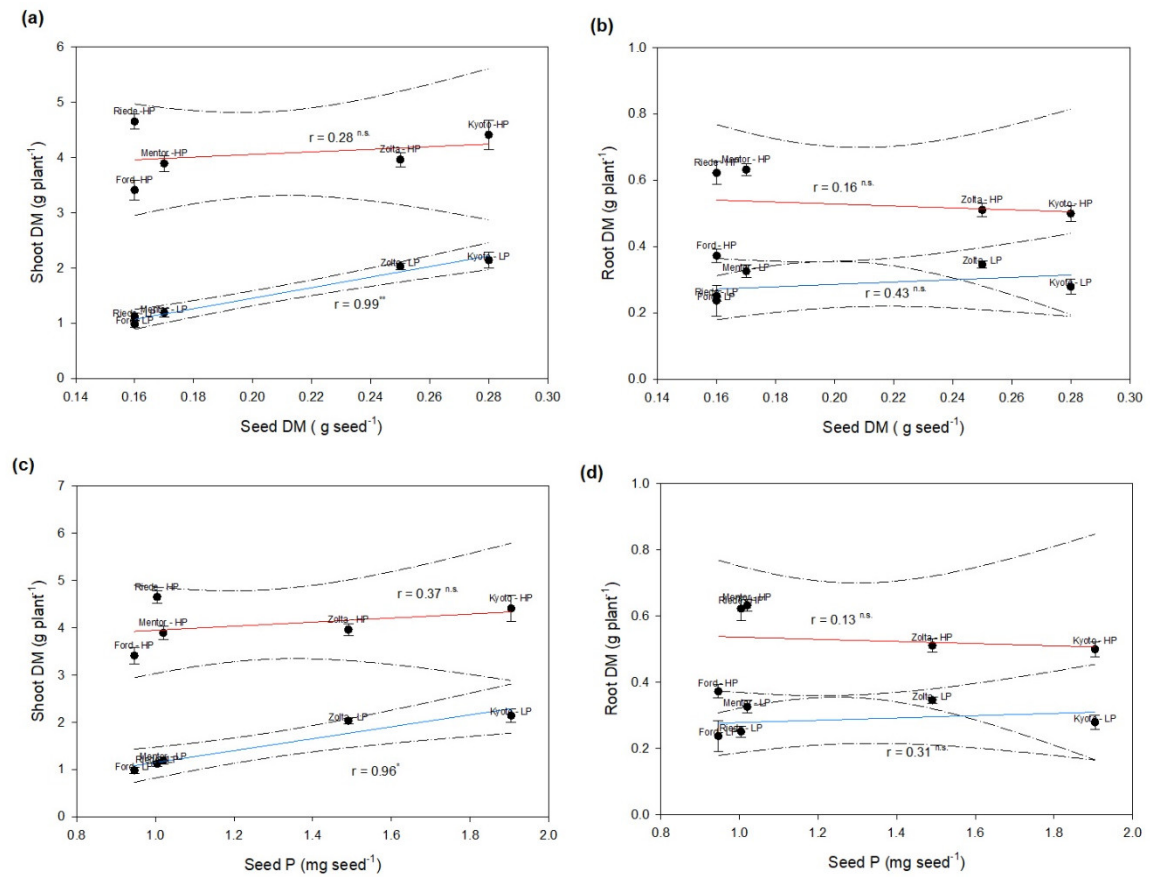

Figure S1. Experiment 2. Correlations of seed DM and seed P content with shoot DM (a & c) and root DM (b & d). Error bars represent standard errors ( $n = 6$ ).
