# Supplementary material
Source: MDPI journal article supplement (https://www.mdpi.com/2073-4395/11/6/1233)
Supplement: s1 [file s1]

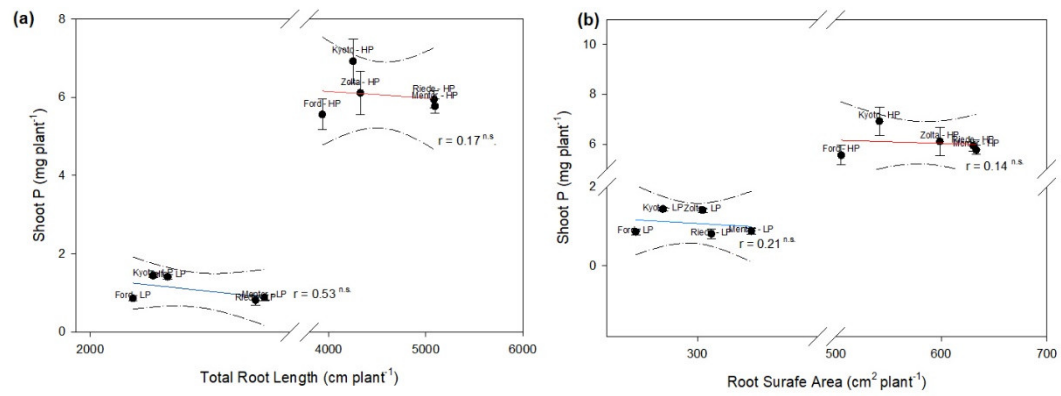

Figure. S2. Experiment 2. Correlations of total root length (a) and root surface area (b) with shoot P uptake. Error bars represent standard errors ( $n = 6$ ).
